# Supplementary material for: Cryoballoon ablation vs. antiarrhythmic drugs: first-line therapy for patients with paroxysmal atrial fibrillation
Source: PubMed Central journal article supplement — Europace. 2021 Mar 17;23(7):1033–41. doi: 10.1093/europace/euab029 (PMC8286851; doi:10.1093/europace/euab029), 2021-03-17
Supplement: euab029_supplementary_data.pdf [file euab029_supplementary_data.pdf]

**Supplementary Appendix**

1  
2  
3  
4  
5  
6  
7  
8  
9  
10  
11  
12

**Table S1.** Enrollment summary by center ..... **2**

**Table S2.** General procedural characteristics in patients undergoing ablation in the cryoballoon arm .. **3**

**Table S3.** Procedural characteristics by vein in patients undergoing ablation in the cryoballoon arm ... **4**

**Table S4.** Atrial fibrillation detection and percent of time in atrial fibrillation during 7-day Holter monitoring at each follow-up visit amongst patients in the intention-to-treat cohort ..... **6**

**Figure S1.** Boxplot showing the estimated percent of time in atrial fibrillation during 7-day Holter monitoring at each follow-up visit amongst patients in the intention-to-treat cohort. .... **7**

1 **Table S1.** Enrollment summary by center

| Country     | City           | Investigator     | Center                                               | Enrolled Subjects | Randomized Subjects |
|-------------|----------------|------------------|------------------------------------------------------|-------------------|---------------------|
| Argentina   | Buenos Aires   | F. Scazzuso      | Instituto Cardiovascular de Buenos Aires (ICBA)      | 1                 | 1                   |
| Australia   | Clayton        | S. Healy         | Monash Medical Center                                | 15                | 15                  |
| Belgium     | Brussel        | GB. Chierchia    | Vrije Universiteit Brussel                           | 25                | 25                  |
| Croatia     | Zagreb         | N. Pavlovic      | Sestre Milosrdnice University Hospital Centre,       | 37                | 37                  |
| Croatia     | Zagreb         | V. Velagic       | University Hospital Centre Zagreb                    | 30                | 30                  |
| France      | Tours          | C. Loose         | Clinique Saint-Gatien                                | 2                 | 2                   |
| France      | Rouen          | F. Anselme       | CHU de Rouen                                         | 5                 | 5                   |
| France      | Amiens         | JS. Hermida      | Centre Hospitalier Universitaire d'Amiens-Picardie   | 21                | 20                  |
| France      | Paris          | N. Badenco       | AP-HP Sorbonne Université, Hopital Pitié-Salpêtrière | 10                | 10                  |
| France      | Grenoble       | P. Defaye        | Centre Hospitalier Universitaire de Grenoble-Alpes   | 1                 | 1                   |
| Germany     | Kaiserslautern | B. Schumacher    | Westpfalz-Klinikum                                   | 0                 | 0                   |
| Germany     | Hamburg        | C. Meyer         | University Heart Center                              | 10                | 10                  |
| Germany     | Frankfurt      | K.R. Julian Chun | Cardioangiologisches Centrum Bethanien (CCB)         | 1                 | 1                   |
| Germany     | Bad Nauheim    | M. Kuniss        | Kerckhoff Heart Center                               | 31                | 31                  |
| Germany     | München        | U. Dorwarth      | Klinik Bogenhausen                                   | 2                 | 2                   |
| Italy       | Massa Carrara  | G. Arena         | Ospedale Apuane                                      | 13                | 13                  |
| Italy       | Cotignola      | S. Iacopino      | Maria Cecilia Hospital                               | 7                 | 6                   |
| Netherlands | Eindhoven      | L. Dekker        | Catharina Ziekenhuis                                 | 2                 | 2                   |
| Netherlands | Rotterdam      | T. Szili-Torok   | Erasmus Medisch Centrum                              | 0                 | 0                   |
| Norway      | Bergen         | J. Chen          | Haukeland University Hospital                        | 7                 | 7                   |

2

3

1 **Table S2. General procedural characteristics in patients undergoing ablation in the cryoballoon**  
2 **arm**

| <b>Procedural Characteristics</b>                     | <b>Cryoballoon CA<br/>(N = 107)</b> |
|-------------------------------------------------------|-------------------------------------|
| Number of patients who received Cryo-Ablation         | 96 (89.7%)                          |
| Procedure duration (min)                              | 83.8±28.6                           |
| Fluoroscopy time (RAO+LAO) (min)                      | 16.4±13.7                           |
| Length of catheter exposure time in left atrium (min) | 60.7±44.1                           |
| Adjunctive mapping or visualization device used       | 3 (2.8%)                            |

3

4

1 **Table S3. Procedural characteristics by vein in patients undergoing ablation in the cryoballoon arm**

| Procedure Characteristic                        | Vein       |            |            |            |            |            |
|-------------------------------------------------|------------|------------|------------|------------|------------|------------|
|                                                 | LSPV       | LIPV       | LCPV       | RSPV       | RIPV       | RMPV       |
| <b>Patients without vein present</b>            | 11 (10.3%) | 11 (10.3%) | 85 (79.4%) | 0 (0.0%)   | 0 (0.0%)   | 88 (82.2%) |
| <b>28 mm cryoballoon used</b>                   | 84 (78.5%) | 83 (77.6%) | 11 (10.3%) | 95 (88.8%) | 96 (89.7%) | 8 (7.5%)   |
| <b>23 mm cryoballoon used</b>                   | 1 (0.9%)   | 2 (1.9%)   | 0 (0.0%)   | 1 (0.9%)   | 0 (0.0%)   | 0 (0.0%)   |
| <b>Max grade of occlusion:</b>                  |            |            |            |            |            |            |
| I                                               | 1 (0.9%)   | 1 (0.9%)   | 1 (0.9%)   | 1 (0.9%)   | 1 (0.9%)   | 1 (0.9%)   |
| II                                              | 0 (0.0%)   | 0 (0.0%)   | 0 (0.0%)   | 0 (0.0%)   | 5 (4.7%)   | 0 (0.0%)   |
| III                                             | 5 (4.7%)   | 10 (9.3%)  | 4 (3.7%)   | 5 (4.7%)   | 15 (14.0%) | 3 (2.8%)   |
| IV                                              | 79 (73.8%) | 74 (69.2%) | 7 (6.5%)   | 88 (82.2%) | 75 (70.1%) | 3 (2.8%)   |
| <b>Focal cryo catheter used?</b>                | 2 (1.9%)   | 2 (1.9%)   | 0 (0.0%)   | 1 (0.9%)   | 4 (3.7%)   | 2 (1.9%)   |
| <b>Number of cryo-applications</b>              | 1.4±0.6    | 1.4±0.6    | 2.4±1.5    | 1.4±0.6    | 1.4±0.8    | 1.3±0.5    |
| <b>Number of bonus freezes performed</b>        | 0.7±0.6    | 0.7±0.6    | 1.3±0.8    | 0.7±0.7    | 0.7±0.6    | 0.5±0.7    |
| <b>Minimum temperature (degrees Celsius)</b>    | 46.7±11.6  | 44.8±7.2   | 49.4±6.5   | 49.8±6.0   | 46.8±6.7   | 43.3±9.5   |
| <b>Achieve mapping catheter utilized?</b>       |            |            |            |            |            |            |
| No                                              | 3 (2.8%)   | 4 (3.7%)   | 0 (0.0%)   | 6 (5.6%)   | 3 (2.8%)   | 0 (0.0%)   |
| Yes, 15 mm                                      | 8 (7.5%)   | 8 (7.5%)   | 1 (0.9%)   | 10 (9.3%)  | 8 (7.5%)   | 2 (1.9%)   |
| Yes, 20 mm                                      | 74 (69.2%) | 73 (68.2%) | 10 (9.3%)  | 80 (74.8%) | 85 (79.4%) | 6 (5.6%)   |
| <b>Achieve mapping catheter online signal:</b>  |            |            |            |            |            |            |
| No                                              | 16 (15.0%) | 30 (28.0%) | 7 (6.5%)   | 28 (26.2%) | 33 (30.8%) | 3 (2.8%)   |
| Yes                                             | 63 (58.9%) | 48 (44.9%) | 4 (3.7%)   | 61 (57.0%) | 56 (52.3%) | 4 (3.7%)   |
| If yes, time to effect (seconds)                | 54.8±37.8  | 34.6±18.4  | 46.6±25.8  | 44.0±45.9  | 49.1±32.0  | 70.3±73.6  |
| <b>If premature freeze interruption, reason</b> |            |            |            |            |            |            |
| No premature freeze interruption                | 74 (69.2%) | 72 (67.3%) | 9 (8.4%)   | 76 (71.0%) | 81 (75.7%) | 8 (7.5%)   |

|                     |          |          |          |          |          |          |
|---------------------|----------|----------|----------|----------|----------|----------|
| Technical reason    | 0 (0.0%) | 0 (0.0%) | 0 (0.0%) | 0 (0.0%) | 0 (0.0%) | 0 (0.0%) |
| Patient discomfort  | 0 (0.0%) | 0 (0.0%) | 0 (0.0%) | 0 (0.0%) | 0 (0.0%) | 0 (0.0%) |
| Phrenic nerve palsy | 1 (0.9%) | 0 (0.0%) | 0 (0.0%) | 4 (3.7%) | 1 (0.9%) | 0 (0.0%) |
| Dislocation         | 1 (0.9%) | 2 (1.9%) | 0 (0.0%) | 1 (0.9%) | 1 (0.9%) | 0 (0.0%) |
| Other               | 2 (1.9%) | 0 (0.0%) | 1 (0.9%) | 5 (4.7%) | 5 (4.7%) | 0 (0.0%) |

1 Values are n (%) or mean  $\pm$  standard deviation. LSPV, left superior pulmonary vein; LIPV, left inferior pulmonary vein; LCPV,

2 left common pulmonary vein; RSPV, right superior pulmonary vein; RIPV, right inferior pulmonary vein; RMPV, right middle

3 pulmonary vein.

4

1 **Table S4.** Atrial fibrillation detection and percent of time in atrial fibrillation during 7-day Holter  
 2 monitoring at each follow-up visit amongst patients in the intention-to-treat cohort.

|                                                         | <b>Cryoballoon CA</b> | <b>AAD</b>   |
|---------------------------------------------------------|-----------------------|--------------|
| <b>Baseline</b>                                         |                       |              |
| Number of subjects with measure available, N (%)        | 84 (100.0%)           | 88 (100.0%)  |
| AF burden amongst all subjects, Mean (StD)              | 1.9 ( 7.7)            | 2.3 ( 10.3)  |
| Number of subjects with AF detected, N (%)              | 15 (17.9%)            | 17 (19.3%)   |
| AF burden amongst subjects with AF detected, Mean (StD) | 10.9 ( 15.6)          | 11.7 ( 21.6) |
| <b>1 Month FUP</b>                                      |                       |              |
| Number of subjects with measure available, N (%)        | 81 (98.8%)            | 85 (100.0%)  |
| AF burden amongst all subjects, Mean (StD)              | 0.6 ( 4.5)            | 1.6 ( 5.8)   |
| Number of subjects with AF detected, N (%)              | 4 (4.9%)              | 17 (20.0%)   |
| AF burden amongst subjects with AF detected, Mean (StD) | 12.5 ( 18.5)          | 7.9 ( 11.0)  |
| <b>3 Month FUP</b>                                      |                       |              |
| Number of subjects with measure available, N (%)        | 88 (100.0%)           | 96 (100.0%)  |
| AF burden amongst all subjects, Mean (StD)              | 0.3 ( 2.0)            | 1.1 ( 7.6)   |
| Number of subjects with AF detected, N (%)              | 3 (3.4%)              | 10 (10.4%)   |
| AF burden amongst subjects with AF detected, Mean (StD) | 9.3 ( 6.7)            | 10.9 ( 22.3) |
| <b>6 Month FUP</b>                                      |                       |              |
| Number of subjects with measure available, N (%)        | 86 (100.0%)           | 86 (100.0%)  |
| AF burden amongst all subjects, Mean (StD)              | 0.0 ( 0.2)            | 2.3 ( 11.6)  |
| Number of subjects with AF detected, N (%)              | 2 (2.3%)              | 9 (10.5%)    |
| AF burden amongst subjects with AF detected, Mean (StD) | 1.0 ( 0.0)            | 21.6 ( 30.9) |
| <b>9 Month FUP</b>                                      |                       |              |
| Number of subjects with measure available, N (%)        | 78 (100.0%)           | 82 (98.8%)   |
| AF burden amongst all subjects, Mean (StD)              | 0.8 ( 6.3)            | 1.1 ( 5.1)   |
| Number of subjects with AF detected, N (%)              | 5 (6.4%)              | 9 (10.8%)    |
| AF burden amongst subjects with AF detected, Mean (StD) | 12.8 ( 23.7)          | 9.9 ( 12.8)  |
| <b>12 Month FUP</b>                                     |                       |              |
| Number of subjects with measure available, N (%)        | 78 (98.7%)            | 75 (98.7%)   |
| AF burden amongst all subjects, Mean (StD)              | 0.0 ( 0.2)            | 1.7 ( 8.8)   |
| Number of subjects with AF detected, N (%)              | 1 (1.3%)              | 7 (9.2%)     |
| AF burden amongst subjects with AF detected, Mean (StD) | 2.0 ( )               | 18.3 ( 24.5) |

3 The presence of atrial fibrillation and the estimated percent of time in atrial fibrillation was classified by  
 4 the Holter core lab.

5

6

1

2 **Figure S1.** Boxplot showing the estimated percent of time in atrial fibrillation during 7-day Holter  
3 monitoring at each follow-up visit amongst patients in the intention-to-treat cohort. The presence of atrial  
4 fibrillation and the estimated percent of time in atrial fibrillation was classified by the Holter core lab.

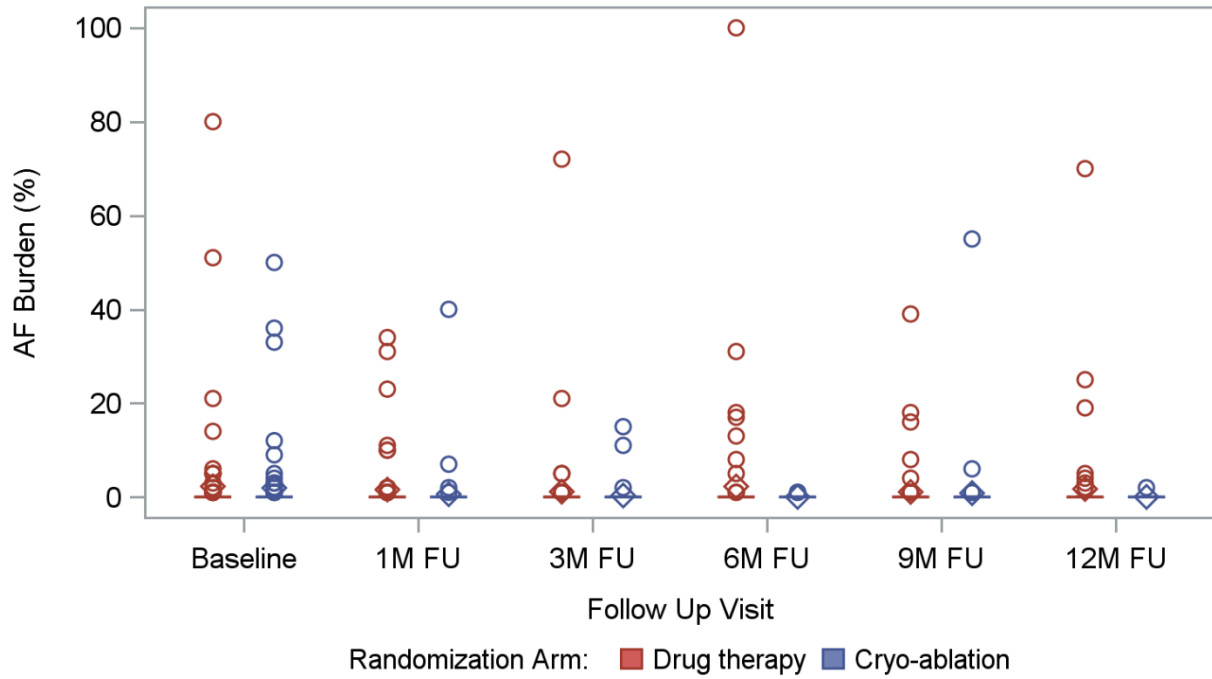

5
